# Supplementary material for: IGFBP1hiWNT3Alo Subtype in Esophageal Cancer Predicts Response and Prolonged Survival with PD-(L)1 Inhibitor
Source: MDPI journal article supplement (doi:10.3390/biology11111575), 2022-10-27
Supplement: s1 [file s1]

**Table S3.** Correlation analysis of significantly upregulated as well as downregulated genes

| Gene Set      | R (Pearson) | P-value |
|---------------|-------------|---------|
| IGFBP1-WNT3A  | -0.308      | <0.001  |
| IGFBP1-WNT5A  | -0.028      | 0.713   |
| IGFBP1-WNT7A  | -0.267      | <0.001  |
| IGFBP1-CAMK2A | -0.136      | 0.0074  |
| AXIN2-WNT3A   | -0.311      | <0.001  |
| AXIN2-WNT5A   | -0.162      | 0.033   |
| AXIN2-WNT7A   | -0.381      | <0.001  |
| AXIN2-CAMK2A  | -0.064      | 0.401   |
| PRKCA-WNT3A   | -0.548      | <0.001  |
| PRKCA-WNT5A   | -0.179      | 0.019   |
| PRKCA-WNT7A   | -0.382      | <0.001  |
| PRKCA-CAMK2A  | -0.033      | 0.666   |
| PRKCD-WNT3A   | -0.369      | <0.001  |
| PRKCD-WNT5A   | -0.008      | 0.914   |
| PRKCD-WNT7A   | -0.235      | 0.002   |
| PRKCD-CAMK2A  | -0.168      | 0.027   |
| ROR1-WNT3A    | -0.375      | <0.001  |
| ROR1-WNT5A    | -0.267      | <0.001  |
| ROR1-WNT7A    | -0.326      | <0.001  |
| ROR1-CAMK2A   | -0.088      | 0.251   |
| ROCK2-WNT3A   | -0.299      | <0.001  |
| ROCK2-WNT5A   | -0.019      | 0.799   |
| ROCK2-WNT7A   | -0.265      | <0.001  |
| ROCK2-CAMK2A  | 0.123       | 0.107   |
