# Supplementary material for: IGFBP1hiWNT3Alo Subtype in Esophageal Cancer Predicts Response and Prolonged Survival with PD-(L)1 Inhibitor
Source: MDPI journal article supplement (doi:10.3390/biology11111575), 2022-10-27
Supplement: s1 [file s1]

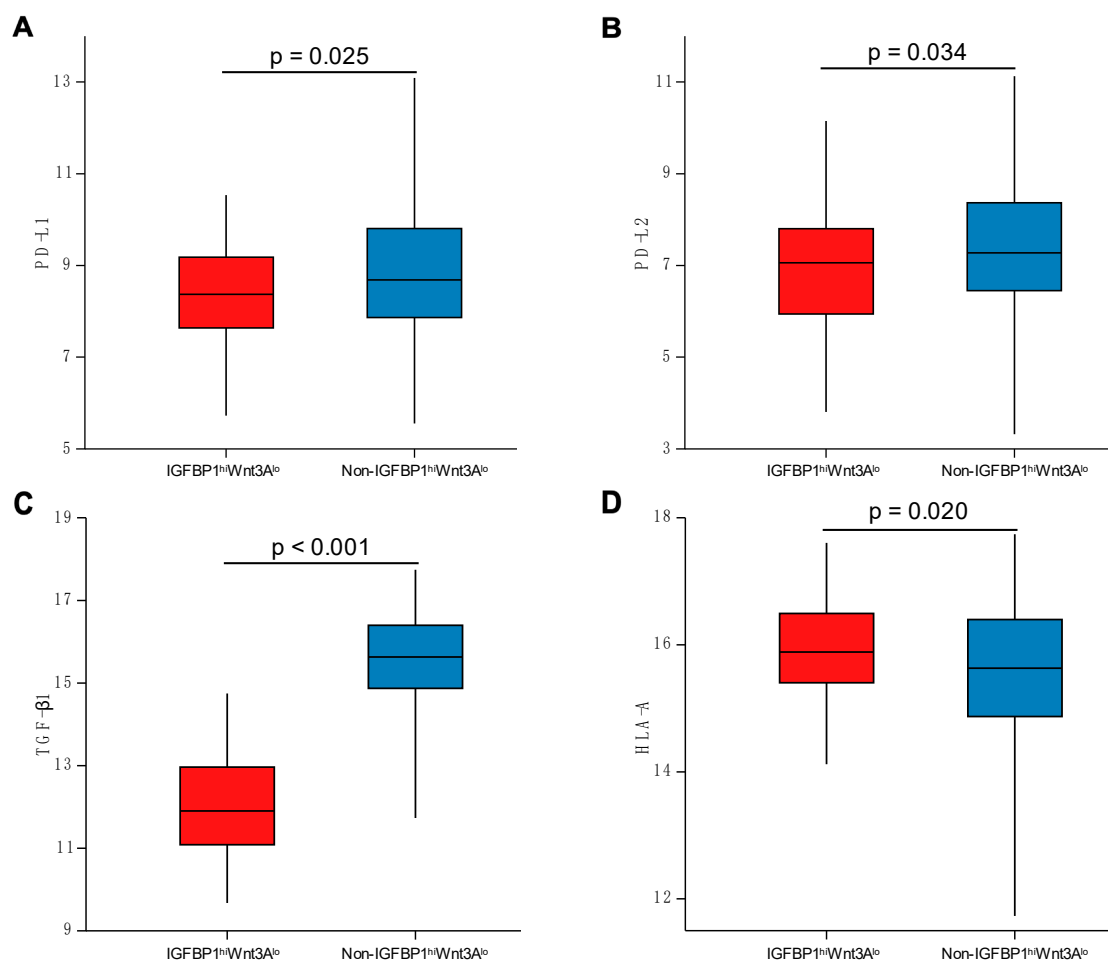

**Figure S1.** Immunoregulatory gene expression profile. (A,B) Box plots demonstrating the expression of the immune co-suppressor genes PD-L1/PD-L2. (C) Box plot demonstrating TGF-β1 expression associated with "immune-desert tumour" formation. (D) Box plot demonstrating the expression of the antigen-presenting gene HLA-A.
