# Supplementary material for: IGFBP1hiWNT3Alo Subtype in Esophageal Cancer Predicts Response and Prolonged Survival with PD-(L)1 Inhibitor
Source: MDPI journal article supplement (doi:10.3390/biology11111575), 2022-10-27
Supplement: s1 [file s1]

**Table S1.** Upregulated genes in the Cluster 3 subtype.

| Gene Symbol | log2(FC) | P-value |
|-------------|----------|---------|
| IGFBP1      | 4.55     | <0.001  |
| AXIN2       | 1.37     | <0.001  |
| PRKCA       | 0.88     | <0.001  |
| ROR1        | 0.69     | 0.003   |
| PRKCD       | 0.56     | <0.001  |
| ROCK2       | 0.51     | <0.001  |
| DKK1        | 0.5      | 0.114   |
| LRP5        | 0.49     | 0.001   |
| LRP6        | 0.44     | <0.001  |
| TLE1        | 0.43     | <0.001  |
| PTPRO       | 0.41     | 0.065   |
| DDIT3       | 0.39     | 0.002   |
| GNAQ        | 0.35     | <0.001  |
| APOE        | 0.33     | 0.181   |
| CTNNB1      | 0.31     | 0.001   |
| EDA         | 0.29     | 0.182   |
| XIAP        | 0.29     | <0.001  |
| RHOA        | 0.24     | <0.001  |
| MAPK8       | 0.23     | 0.011   |
| PPM1B       | 0.22     | <0.001  |
| WNT11       | 0.2      | 0.52    |
| ROCK1       | 0.19     | 0.032   |
| ATP6AP2     | 0.18     | 0.028   |
| C20orf111   | 0.13     | 0.129   |
| WNT1        | 0.12     | 0.68    |
| UBE2B       | 0.01     | 0.921   |
