# Supplementary material for: IGFBP1hiWNT3Alo Subtype in Esophageal Cancer Predicts Response and Prolonged Survival with PD-(L)1 Inhibitor
Source: MDPI journal article supplement (doi:10.3390/biology11111575), 2022-10-27
Supplement: s1 [file s1]

**Table S5.** Multifactorial Cox regression analysis in the BJCH cohort.

| Characteristics                          | HR    | 95%CI |       | P-value |
|------------------------------------------|-------|-------|-------|---------|
|                                          |       | low   | high  |         |
| Age                                      | 0.681 | 0.336 | 1.378 | 0.285   |
| TNM                                      | 0.021 | 0.180 | 0.042 | 0.021*  |
| IGFBP1 <sup>hi</sup> WNT3A <sup>lo</sup> | 2.061 | 1.012 | 4.200 | 0.046*  |
