# Supplementary material for: IGFBP1hiWNT3Alo Subtype in Esophageal Cancer Predicts Response and Prolonged Survival with PD-(L)1 Inhibitor
Source: MDPI journal article supplement (doi:10.3390/biology11111575), 2022-10-27
Supplement: s1 [file s1]

**Table S4.** Comparison of clinical characteristics in the BJCH cohort.

| Characteristics         | Overall,<br>n = 95 | IGFBP1 <sup>hi</sup> WNT3A <sup>lo</sup> ,<br>n = 31(%) | Non-IGFBP1 <sup>hi</sup> WNT3A <sup>lo</sup> ,<br>n = 64(%) | P-value |
|-------------------------|--------------------|---------------------------------------------------------|-------------------------------------------------------------|---------|
| Sex                     |                    |                                                         |                                                             | 0.168   |
| Male                    | 78                 | 28(90.3%)                                               | 50(78.1%)                                                   |         |
| Female                  | 17                 | 3(9.7%)                                                 | 14(21.9%)                                                   |         |
| Age, years              |                    |                                                         |                                                             | 0.262   |
| < 60                    | 37                 | 15(48.4%)                                               | 22(34.4%)                                                   |         |
| ≥60                     | 58                 | 16(51.6%)                                               | 42(65.6%)                                                   |         |
| Smoking                 |                    |                                                         |                                                             | 0.816   |
| No                      | 31                 | 11(35.5%)                                               | 20(31.3%)                                                   |         |
| Yes                     | 64                 | 20(64.5%)                                               | 44(68.8%)                                                   |         |
| Drinking                |                    |                                                         |                                                             | 0.648   |
| No                      | 33                 | 12(38.7%)                                               | 21(32.8%)                                                   |         |
| Yes                     | 62                 | 19(61.3%)                                               | 43(67.2%)                                                   |         |
| Family history          |                    |                                                         |                                                             | 0.010*  |
| No                      | 66                 | 27(87.1%)                                               | 39(60.9%)                                                   |         |
| Yes                     | 29                 | 4(12.9%)                                                | 25(39.1%)                                                   |         |
| Tumor length, cm        |                    |                                                         |                                                             | 0.268   |
| ≤3                      | 55                 | 15(48.4%)                                               | 40(62.5%)                                                   |         |
| >3                      | 40                 | 16(51.6%)                                               | 24(37.5%)                                                   |         |
| Histological type       |                    |                                                         |                                                             | 0.267   |
| Squamous cell carcinoma | 87                 | 30(96.8%)                                               | 57(89.1%)                                                   |         |
| Adenocarcinoma          | 8                  | 1(3.2%)                                                 | 7(10.9%)                                                    |         |
| Differentiation         |                    |                                                         |                                                             | 0.429   |
| Low                     | 30                 | 10(32.3%)                                               | 20(31.3%)                                                   |         |
| Middle                  | 55                 | 16(51.6%)                                               | 39(60.9%)                                                   |         |
| High                    | 10                 | 5(16.1%)                                                | 5(7.8%)                                                     |         |
| AJCC stage              |                    |                                                         |                                                             | 0.330   |
| I+II                    | 25                 | 6(19.4%)                                                | 19(29.7%)                                                   |         |
| III+IV                  | 70                 | 25(80.6%)                                               | 45(70.3%)                                                   |         |
| Treatment               |                    |                                                         |                                                             | 0.804   |
| Non-neoadjuvant         | 25                 | 9(29.0%)                                                | 16(25.0%)                                                   |         |
| Neoadjuvant             | 70                 | 22(71.0%)                                               | 48(75.0%)                                                   |         |
