# Supplementary material for: IGFBP1hiWNT3Alo Subtype in Esophageal Cancer Predicts Response and Prolonged Survival with PD-(L)1 Inhibitor
Source: MDPI journal article supplement (doi:10.3390/biology11111575), 2022-10-27
Supplement: s1 [file s1]

**Table S2.** Downregulated genes in the Cluster 3 subtype.

| Gene Symbol | log <sub>2</sub> (FC) | P-value |
|-------------|-----------------------|---------|
| WNT3A       | -5.6                  | <0.001  |
| WNT7A       | -3.22                 | <0.001  |
| CAMK2A      | -2                    | <0.001  |
| FAM123A     | -1.44                 | 0.03    |
| WNT5A       | -1.22                 | <0.001  |
| SOSTDC1     | -1.11                 | 0.002   |
| EGFR        | -1.1                  | <0.001  |
| ROR2        | -0.87                 | <0.001  |
| DAAM1       | -0.73                 | <0.001  |
| APC2        | -0.59                 | <0.001  |
| NFATC1      | -0.58                 | <0.001  |
| CSNK1A1     | -0.53                 | <0.001  |
| JUN         | -0.4                  | 0.004   |
| AMFR        | -0.4                  | <0.001  |
| EXT1        | -0.4                  | <0.001  |
| CSNK1G2     | -0.32                 | <0.001  |
| FGFR2       | -0.28                 | 0.144   |
| VANGL1      | -0.28                 | 0.006   |
| FAM53B      | -0.27                 | 0.002   |
| YAP1        | -0.22                 | 0.012   |
| LZTS2       | -0.21                 | 0.025   |
| DAB2IP      | -0.19                 | 0.069   |
| APC         | -0.1                  | 0.228   |
| AXIN1       | -0.07                 | 0.427   |
| BCL9L       | -0.07                 | 0.418   |
| RAC1        | -0.03                 | 0.711   |
| CCDC88C     | -0.03                 | 0.777   |
| TMEM64      | -0.02                 | 0.874   |
| CDC42       | -0.01                 | 0.867   |
